# Supplementary material
Source: PubMed Central journal article supplement (PMC3172150)

# Supporting Information

for

## Triethylsilyl Perfluoro-Tetraphenylborate, [Et<sub>3</sub>Si<sup>+</sup>][F<sub>20</sub>-BPh<sub>4</sub><sup>-</sup>], a widely used Non-Existent Compound

Matthew Nava and Christopher A. Reed\*

|                                                                                                          |    |
|----------------------------------------------------------------------------------------------------------|----|
| <i>General Considerations</i> .....                                                                      | S2 |
| <i>Synthesis of [Ph<sub>3</sub>C][F<sub>20</sub>-BPh<sub>4</sub>], <b>1</b>.....</i>                     | S2 |
| <i>Synthesis of [Et<sub>3</sub>SiHSiEt<sub>3</sub>][F<sub>20</sub>-BPh<sub>4</sub>] <b>2</b> .....</i>   | S3 |
| <i>Synthesis of [i-Pr<sub>3</sub>SiHSi-Pr<sub>3</sub>][F<sub>20</sub>-BPh<sub>4</sub>] <b>3</b>.....</i> | S5 |
| <i>Synthesis of [Me<sub>3</sub>SiHSiMe<sub>3</sub>][F<sub>20</sub>-BPh<sub>4</sub>], <b>4</b>.....</i>   | S6 |
| <i>Controlled Addition of Et<sub>3</sub>SiH to <b>1</b>.....</i>                                         | S6 |
| <i>NMR Titration of <b>2</b> with Me<sub>6</sub>C<sub>6</sub>.....</i>                                   | S8 |

**11 pages**

## General Considerations:

All reactions were carried out in a helium atmosphere glovebox with  $O_2 < 1\text{ppm}$  or utilizing standard Schlenk and vacuum line techniques. Hexane, diethylether and isooctane were distilled from sodium/benzophenone. Dichloromethane was distilled from  $P_2O_5$ . Triethylsilane and triisopropylsilane were degassed and stored over 4A molecular sieves 1 week prior to use. n-Butyl lithium, boron trichloride, potassium chloride and triphenylmethylbromide were purchased from Acros and used as received. Bromopentafluorobenzene and triethylsilane were purchased from Oakwood Products. NMR spectra were obtained on a Bruker Avance 300 MHz and referenced to the solvent signal. IR spectra were obtained on a Perkin Elmer Spectrum 100 FT-IR with ATR capabilities in a nitrogen filled glovebox. Elemental analyses were performed by Desert Analytical Services, Tucson, AZ.

**Synthesis of  $[Ph_3C][F_{20}\text{-BPh}_4]$ , **1**.** This was prepared according to Romanato, P.; Duttwyler, S.; Linden, A.; Baldrige, K. K.; and Siegel, J. S. *J. Am. Chem. Soc.*, 2010, *132*, 7828–7829 except for two changes. The synthesis of the precursor  $K[F_{20}\text{-BPh}_4]$  was performed on a 20g scale with respect to bromopentafluorobenzene and isooctane was used instead of cyclohexanone for washing **1**. Identical yields were obtained.

$^1\text{H NMR}$  ( $C_6D_6$  25 °C): 6.79 (d, 1H, p,  $J = 8.22$  Hz), 7.07 (t, 2H, m,  $J = 7.62$  Hz), 7.39 (t, 2H, o,  $J = 7.53$  Hz)

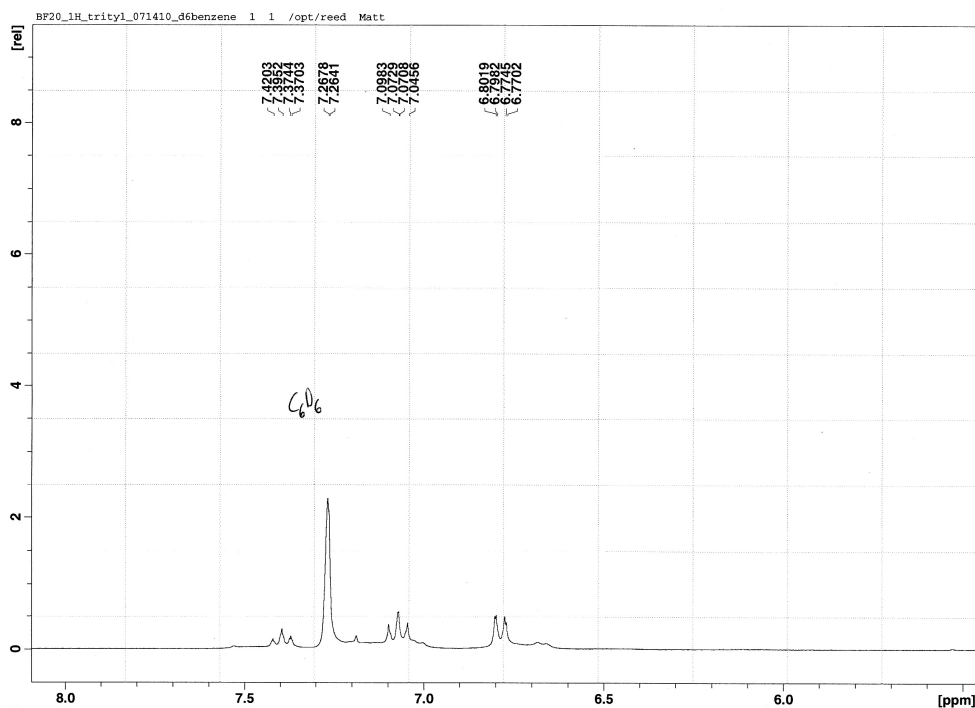

**Synthesis of  $[\text{R}_3\text{SiHSiR}_3][\text{F}_{20}\text{-BPh}_4]$ ,  $\text{R}=\text{Et}$ , **2**;  $\text{R} = \text{i-Pr}$ , **3**.** In a 12 mL glass vial with a teflon stirbar and screw cap, 500mg of **1** was layered with 2mL of hexane. 1.5 mL of the appropriate silane was added via pipette and the reaction was allowed to stir for 36 (for **2**) or 48 (for **3**) hours yielding a faintly brown, white suspension. The solid was collected on a medium filter frit and washed with 1 mL of dry hexane before being transferred to a small Schlenk tube and dried under vacuum. After 5 minutes of drying, the solid was returned to the same filter frit, washed with 2 mL of hexane and redried for 10 minutes.

Anal calcd for **2**,  $\text{C}_{36}\text{H}_{31}\text{F}_{20}\text{BSi}_2$ : C, 47.48; H, 3.43. Found: C, 47.24; H, 3.42. IR(ATR): 3024, 2975, 2946, 2917, 2886  $\text{cm}^{-1}$  (weak, ethyl group), 1899  $\text{cm}^{-1}$  (medium, broad, Si-H-Si).  $^1\text{H}$  NMR ( $\text{C}_6\text{D}_6$  25  $^\circ\text{C}$ ): 0.50 (m, 6H,  $\alpha$  ethyl,  $J = 7.98$  Hz), 0.94 (m, 9H,  $\beta$  ethyl,  $J = 7.83$  Hz).

Anal calcd for **3**,  $\text{C}_{42}\text{H}_{43}\text{F}_{20}\text{BSi}_2$ : C, 50.71; H, 4.35. Found: C, 50.01; H, 4.32. IR(ATR): 3022, 2965, 2942, 2879  $\text{cm}^{-1}$  (medium, i-Pr group), 1750  $\text{cm}^{-1}$  (weak, broad, Si-H-Si).

IR  $[\text{Et}_3\text{SiHSiEt}_3][\text{F}_{20}\text{-BPh}_4]$  **2**. Red before diffusion pumping; green after pumping for 6 hrs.

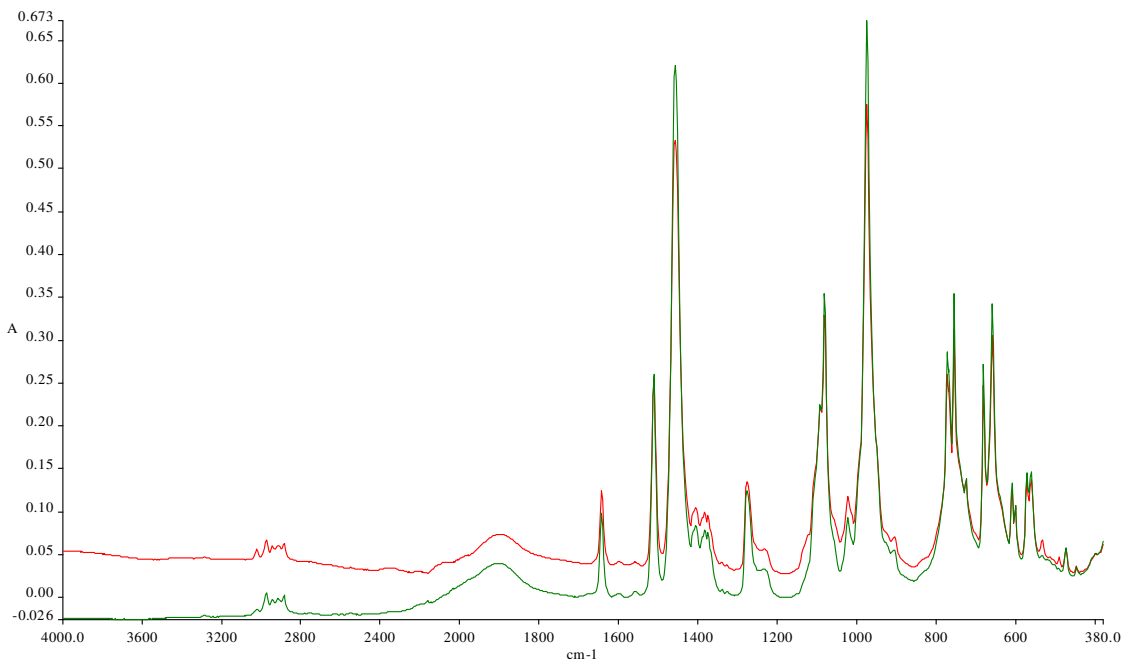

IR [i-Pr<sub>3</sub>SiHSii-Pr<sub>3</sub>][F<sub>20</sub>-BPh<sub>4</sub>] **3**. Black before diffusion pumping; red after pumping for 6 hrs.

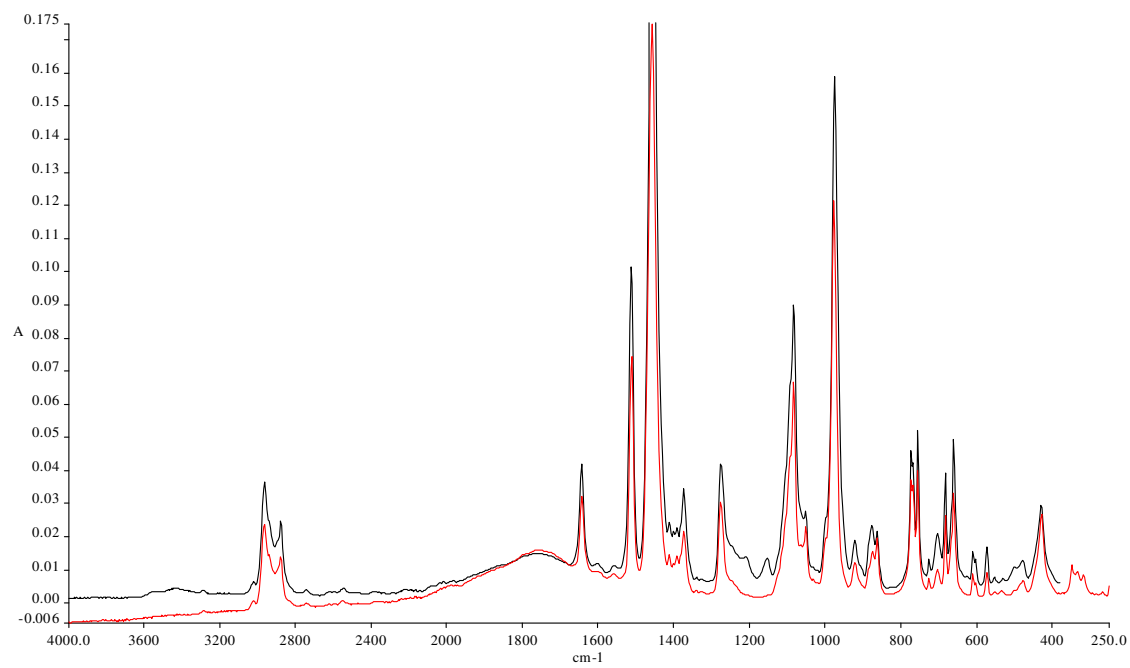

**Synthesis of [Me<sub>3</sub>SiHSiMe<sub>3</sub>][F<sub>20</sub>-BPh<sub>4</sub>], 4.** 1 g of **1** was placed in a thick walled Schlenk tube with a teflon stirbar. The Schlenk tube was removed from the glovebox and placed on a vacuum manifold, evacuated and cooled to -78 °C. After 5 minutes, a large excess (approx 3-5 mL) of trimethylsilane was condensed onto the solid. The Schlenk tube was removed from the vacuum manifold and allowed to stir at room temperature for 24 hours. After 24 hours, it was placed back on the manifold, cooled to -78 °C and *slowly* evacuated to dryness. If the rate of silane removal was too slow, the Schlenk tube was removed from the cold bath and carefully warmed while being evacuated. After the silane was completely removed, a white solid remained. The Schlenk tube was returned to the glove box and the white solid was scrapped out with a spatula. It was placed on a medium filter frit and washed with hexane (2 mL).

Anal calcd for C<sub>36</sub>H<sub>31</sub>F<sub>20</sub>BSi<sub>2</sub>: C, 43.60; H, 2.32. Found: C, 43.62; H, 2.72. IR(ATR): 3029, 2919, cm<sup>-1</sup>(weak, methyl), 1941 cm<sup>-1</sup> (medium, broad, Si-H-Si).

IR [Me<sub>3</sub>SiHSiMe<sub>3</sub>][F<sub>20</sub>-BPh<sub>4</sub>], **4**. Black indicates before diffusion pumping, red indicates after pumping for 6 hrs.

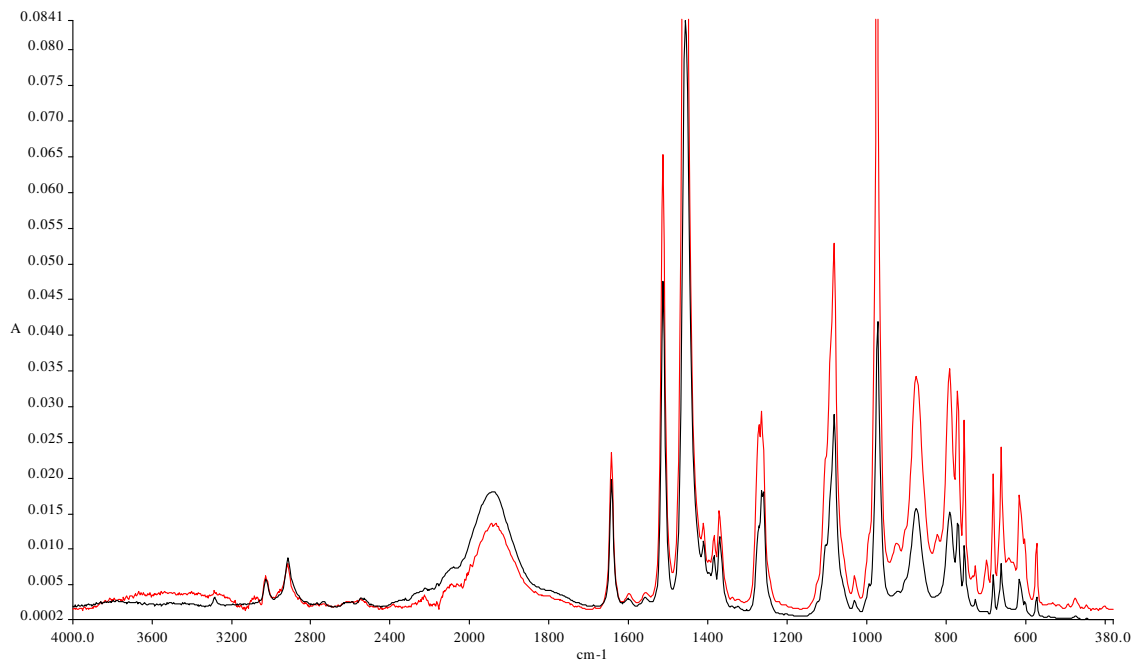

## Synthesis of $[\text{Et}_3\text{SiHSiEt}_3][\text{F}_{20}\text{-BPh}_4]$ , **2**, via controlled addition of

**triethylsilane.** A 1:1 ratio of silane to trityl salt was prepared as follows: 410 mg of **1** was added to a 12 mL vial equipped with a Teflon stirbar and 2 mL of dry hexane was added. 71  $\mu\text{L}$  of triethylsilane was added via calibrated pipette. The capped suspension was allowed to stir for 72 hrs. The product was then isolated according to the above procedure for  $[\text{Et}_3\text{SiHSiEt}_3][\text{F}_{20}\text{-BPh}_4]$ . The collected product retained the orange color of the trityl salt and the  $^1\text{H}$  NMR indicated the presence of the  $\text{Ph}_3\text{C}^+$  ion:

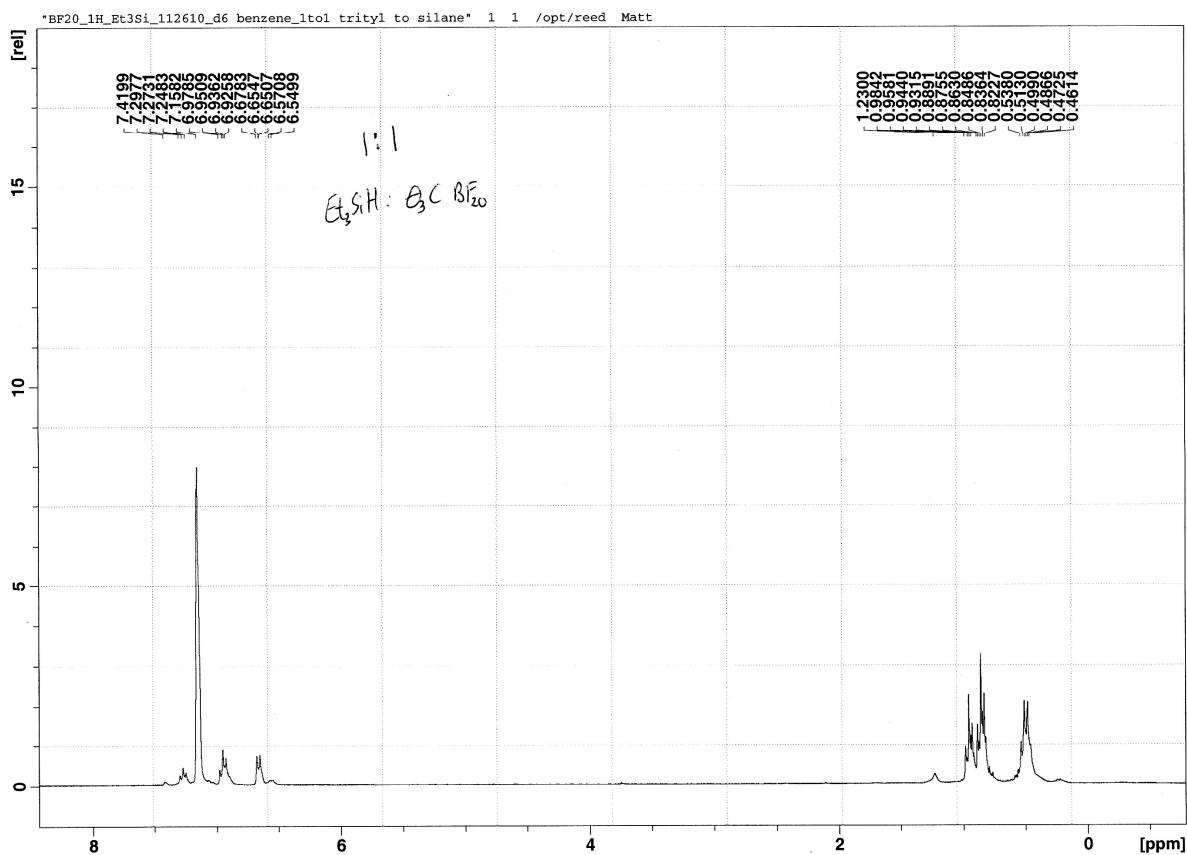

A ca. 2:1 ratio of silane to trityl salt was prepared as follows: 426.7 mg of **1** was added to a 12 mL vial equipped with a Teflon stirbar and 2 mL of dry hexane was added. 170  $\mu\text{L}$  of triethylsilane (2.3 equiv) was added via calibrated pipette. The suspension was allowed to stir for 72 hrs. The product was then isolated according to the above procedure for  $[\text{Et}_3\text{SiHSiEt}_3][\text{F}_{20}\text{-BPh}_4]$ . The collected product no longer retained the color of the trityl ion and the  $^1\text{H}$  NMR spectrum indicated the absence of the  $\text{Ph}_3\text{C}^+$ :

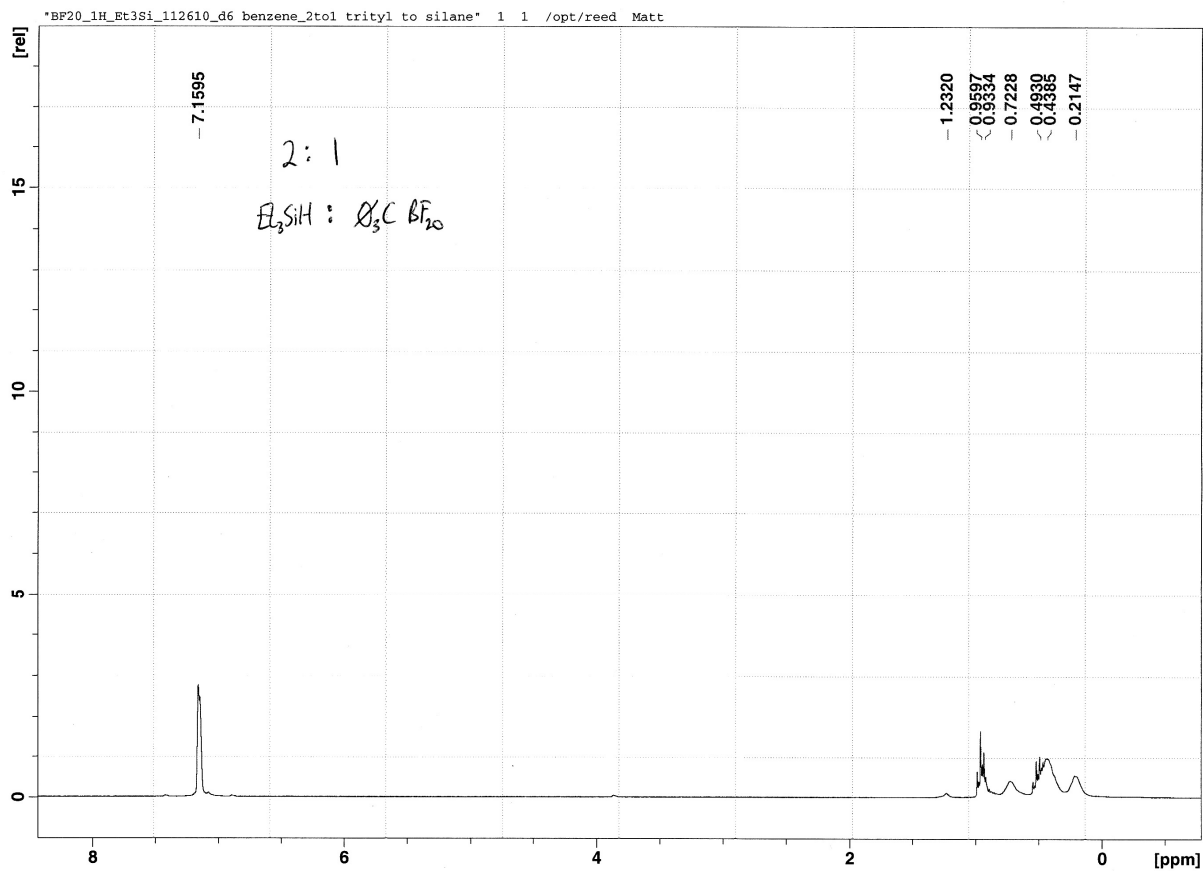

**NMR titration of 2 with C<sub>6</sub>Me<sub>6</sub>.** In a glovebox, six J-Young NMR tubes were loaded with a weighed amounts of **2** (ca. 20-30 mg). Three of the tubes were assumed to contain Et<sub>3</sub>Si(F<sub>20</sub>-BPh<sub>4</sub>) (MW= 794.31) while the other three were assumed to contain [Et<sub>3</sub>SiHSiEt<sub>3</sub>][F<sub>20</sub>-BPh<sub>4</sub>] (MW= 910.59). To each tube, 1 molar equivalent of sublimed C<sub>6</sub>Me<sub>6</sub> was added, followed by dissolution in C<sub>6</sub>D<sub>6</sub>. The <sup>1</sup>H NMR spectra of each sample was then taken. The 18 protons of C<sub>6</sub>Me<sub>6</sub> were integrated against the two β protons of the silylium ion at 0.94 ppm (the alpha protons were not used because free silane, which was always observed, obscures these protons).

<sup>1</sup>H NMR assuming the Et<sub>3</sub>Si[F<sub>20</sub>-BPh<sub>4</sub>] formulation:

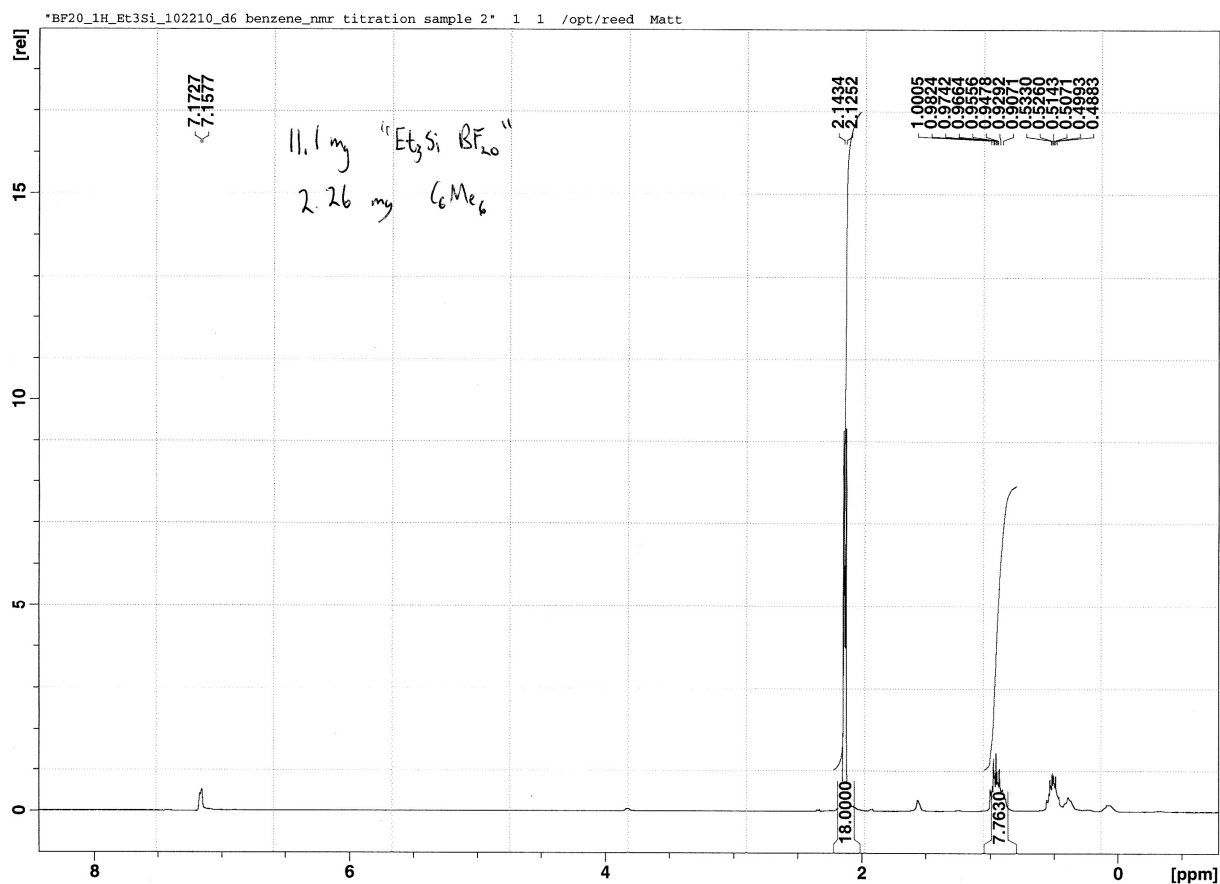



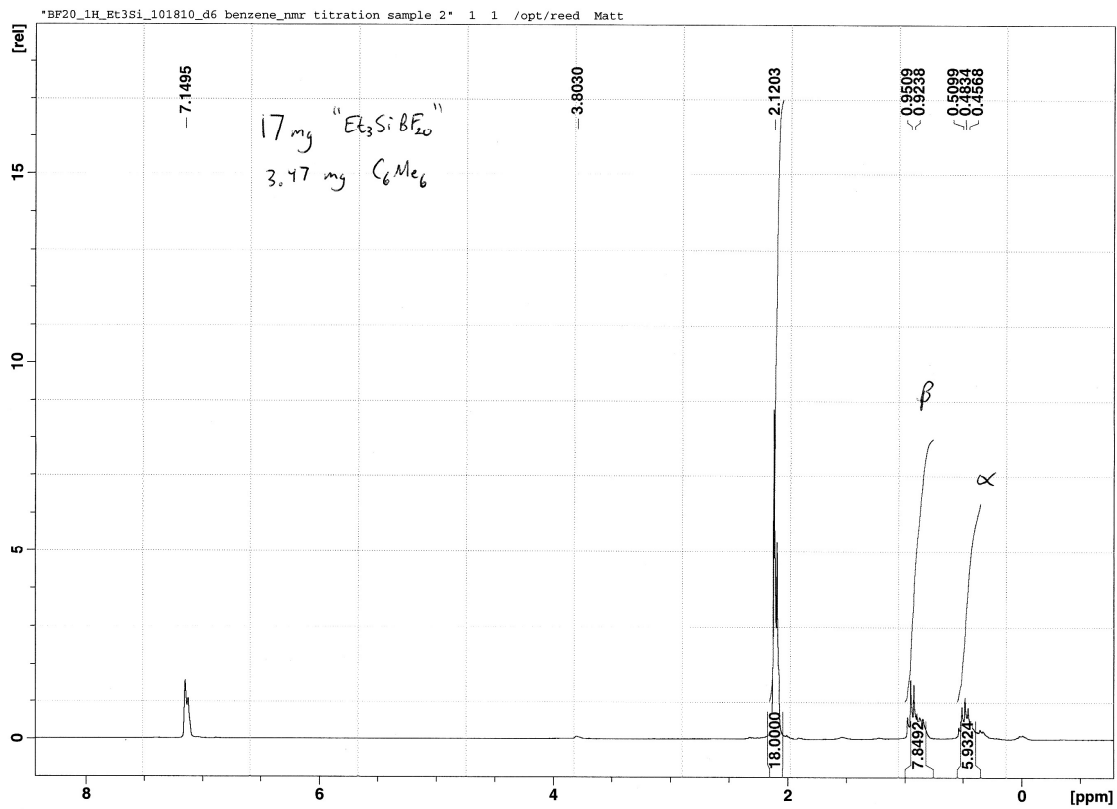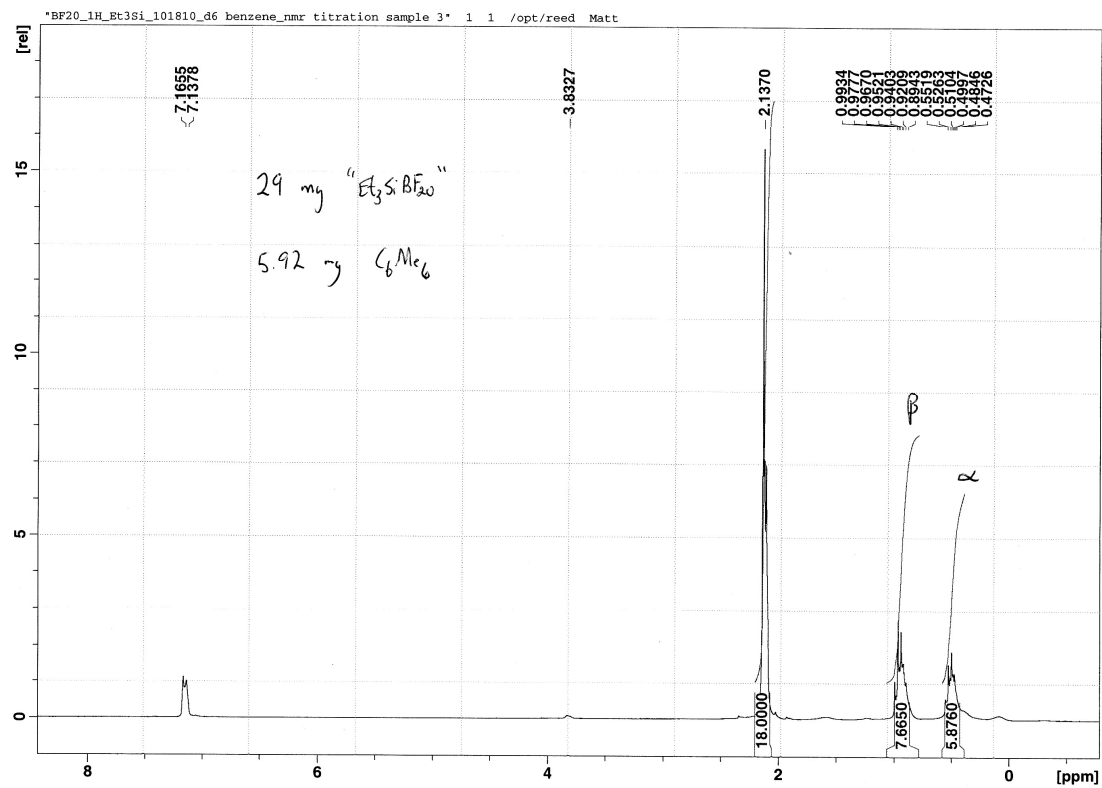

$^1\text{H}$  NMR assuming the  $\text{Et}_3\text{SiHSiEt}_3[\text{F}_{20}\text{-BPh}_4]$  formulation:

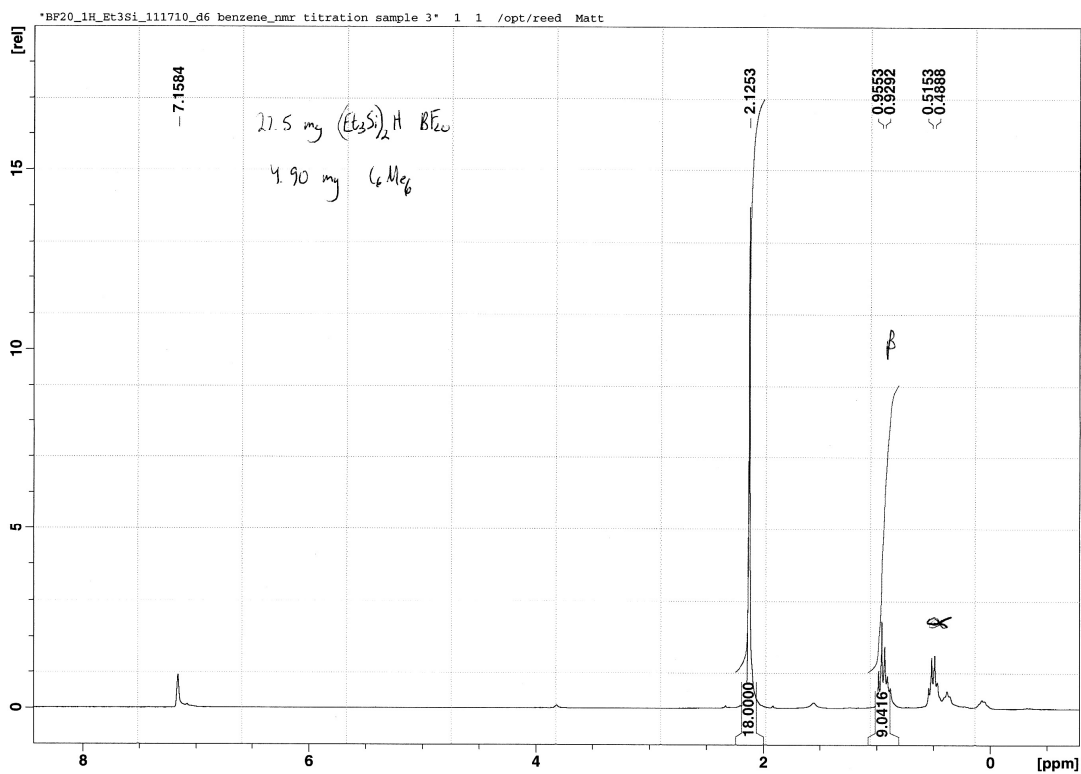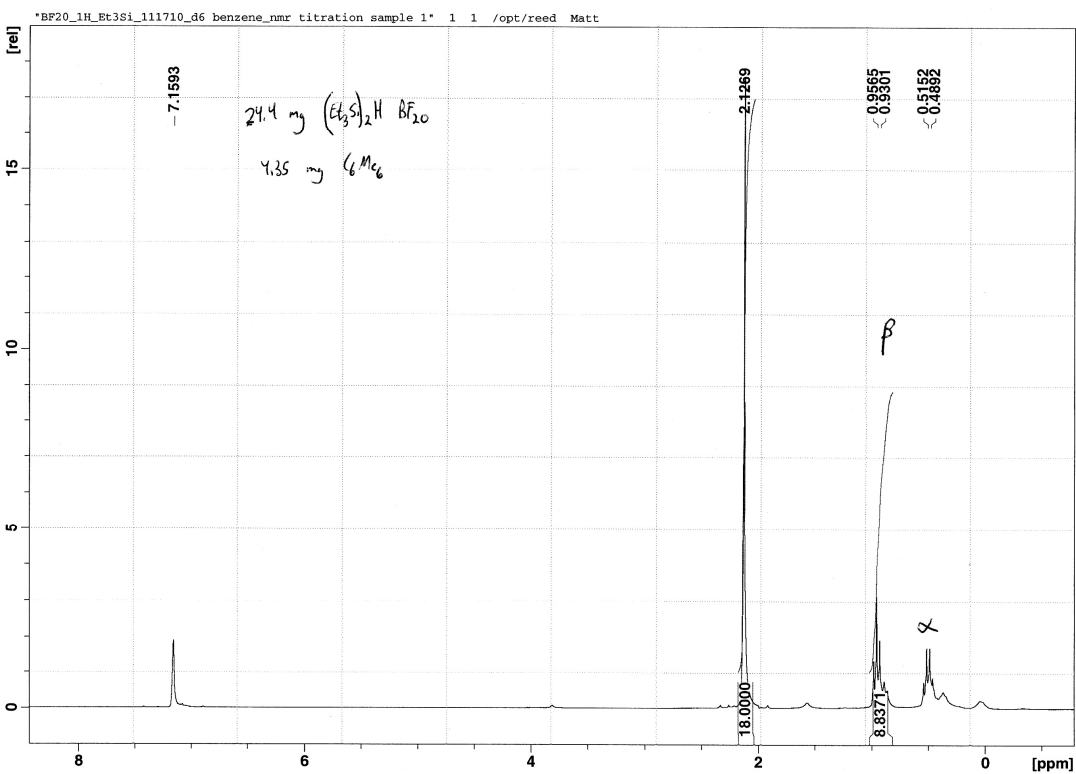

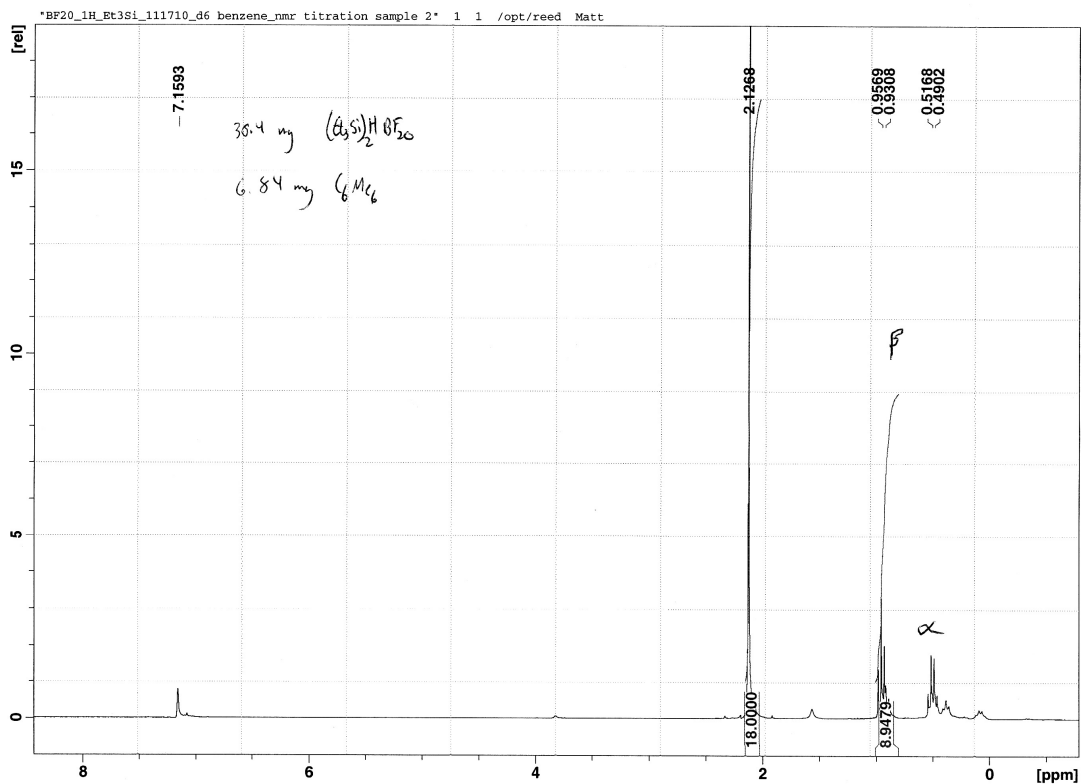

When **2** assumed to have the “ $\text{Et}_3\text{Si}^+$ ” formulation, the integrated ratio of protons from the  $\beta$  silyl group to those of  $\text{C}_6\text{Me}_6$  was always less than 9. This was attributed to the fact that more than a true molar equivalent of  $\text{C}_6\text{Me}_6$  was placed in the NMR tube because the molecular weight of **2** was underestimated. When **2** was assumed to have the “ $\text{Et}_3\text{SiHSiEt}_3^+$ ” formulation, the integrated ratio of  $\beta$  silyl protons was correctly integrated against  $\text{C}_6\text{Me}_6$ .

It is noted that the following reaction takes place when **2** is placed in  $\text{C}_6\text{D}_6$ , resulting in formation of free silane:

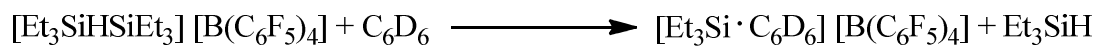

Supplement: NIHMS319817-supplement-1_si_001.pdf [file NIHMS319817-supplement-1_si_001.pdf]
